# Supplementary material for: TCGA-TCIA Impact on Radiogenomics Cancer Research: A Systematic Review
Source: PubMed Central journal article supplement (PMC6929079; doi:10.3390/ijms20236033), 2019-11-29
Supplement: ijms-20-06033-s001.pdf [file ijms-20-06033-s001.pdf]

**Table S1.** Radiogenomic studies with TCGA/TCIA data.

| First Author                                                    | Name                                                                                                                                                     | Journal                        | Year | Number of patients |
|-----------------------------------------------------------------|----------------------------------------------------------------------------------------------------------------------------------------------------------|--------------------------------|------|--------------------|
| <b>Glioblastoma Multiforme (GBM) and Low Grade Glioma (LGG)</b> |                                                                                                                                                          |                                |      |                    |
| Zinn et al [10]                                                 | Radiogenomic Mapping of Edema/Cellular Invasion MRI-Phenotypes in Glioblastoma Multiforme                                                                | Plos One                       | 2011 | 78                 |
| Zinn et al [12]                                                 | A Novel Volume-Age-KPS (VAK) Glioblastoma Classification Identifies a Prognostic Cognate microRNA-Gene Signature                                         | Plos One                       | 2012 | 78                 |
| Jain et al [18]                                                 | Correlation of perfusion parameters with genes related to angiogenesis regulation in glioblastoma: a feasibility study.                                  | AJNR Am J Neuroradiol          | 2012 | 45                 |
| Jain et al [19]                                                 | Genomic Mapping and Survival Prediction in Glioblastoma: Molecular Subclassification Strengthened by Hemodynamic Imaging Biomarkers                      | Radiology                      | 2013 | 18                 |
| Gutman et al [22]                                               | MR Imaging Predictors of Molecular Profile and Survival: Multi-institutional Study of the TCGA Glioblastoma Data Set                                     | Radiology                      | 2013 | 75                 |
| Gevaert et al [13]                                              | Glioblastoma Multiforme: Exploratory Radiogenomic Analysis by Using Quantitative Image Features                                                          | Radiology                      | 2014 | 55                 |
| Colen et al [15]                                                | Imaging genomic mapping of an invasive MRI phenotype predicts patient outcome and metabolic dysfunction: a TCGA glioma phenotype research group project. | BMC Med Genomics               | 2014 | 92                 |
| Jain et al [23]                                                 | Outcome Prediction in Patients with Glioblastoma by Using Imaging, Clinical, and Genomic Biomarkers: Focus on the Nonenhancing Component of the Tumor    | Radiology                      | 2014 | 57                 |
| Rao et al [24]                                                  | A combinatorial radiographic phenotype may stratify patient survival and be associated with invasion and proliferation characteristics in glioblastoma.  | J Neurosurg                    | 2015 | 50                 |
| Gutman et al [21]                                               | Somatic mutations associated with MRI-derived volumetric features in glioblastoma                                                                        | Neuroradiology                 | 2015 | 76                 |
| Nicolasjilwan et al [32]                                        | Addition of MR imaging features and genetic biomarkers strengthens glioblastoma survival prediction in TCGA patients.                                    | J Neuroradiol                  | 2015 | 102                |
| Colen et al [23]                                                | Glioblastoma: imaging genomic mapping reveals sex-specific oncogenic associations of cell death                                                          | Radiology                      | 2015 | 99                 |
| Itakura et al [26]                                              | Magnetic resonance image features identify glioblastoma phenotypic subtypes with distinct molecular pathway activities                                   | Science Translational Medicine | 2015 | 144                |

|                       |                                                                                                                                                                                                           |                           |      |     |
|-----------------------|-----------------------------------------------------------------------------------------------------------------------------------------------------------------------------------------------------------|---------------------------|------|-----|
| Qian et al [27]       | Identification of biomarkers for pseudo and true progression of GBM based on radiogenomics study.                                                                                                         | Oncotarget                | 2016 | 38  |
| Rao et al [20]        | Integrative Analysis of mRNA, microRNA, and Protein Correlates of Relative Cerebral Blood Volume Values in GBM Reveals the Role for Modulators of Angiogenesis and Tumor Proliferation                    | Cancer Inform             | 2016 | 92  |
| Heiland et al [21]    | Molecular differences between cerebral blood volume and vessel size in glioblastoma multiforme                                                                                                            | Oncotarget                | 2017 | 21  |
| Liu et al [28]        | Magnetic resonance perfusion image features uncover an angiogenic subgroup of glioblastoma patients with poor survival and better response to antiangiogenic treatment                                    | Neuro Oncol               | 2017 | 48  |
| Mazurowski et al [16] | Radiogenomics of lower-grade glioma: algorithmically-assessed tumor shape is associated with tumor genomic subtypes and patient outcomes in a multi-institutional study with The Cancer Genome Atlas data | Journal Of Neuro-oncology | 2017 | 110 |
| Lehrer et al [34]     | Multiple-response regression analysis links magnetic resonance imaging features to de-regulated protein expression and pathway activity in lower grade glioma                                             | Oncoscience               | 2017 | 57  |
| Liu et al [29]        | A radiomic signature as a non-invasive predictor of progression-free survival in patients with lower-grade gliomas                                                                                        | NeuroImage: Clinical      | 2018 | 84  |
| Liao et al [30]       | Machine-learning based radiogenomics analysis of MRI features and metagenes in glioblastoma multiforme patients with different survival time                                                              | J Cell Mol Med            | 2019 | 137 |

---

**Breast Cancer (BRCA)**

---

|                       |                                                                                                                               |                   |      |    |
|-----------------------|-------------------------------------------------------------------------------------------------------------------------------|-------------------|------|----|
| Mazurowski et al [38] | Radiogenomic Analysis of Breast Cancer: Luminal B Molecular Subtype Is Associated with Enhancement Dynamics at MR Imaging     | Radiology         | 2014 | 48 |
| Guo et al [50]        | Prediction of clinical phenotypes in invasive breast carcinomas from the integration of radiomics and genomics data.          | J Med Imaging     | 2015 | 91 |
| Zhu et al [51]        | Deciphering Genomic Underpinnings of Quantitative MRI-based Radiomic Phenotypes of Invasive Breast Carcinoma.                 | Sci Rep           | 2015 | 91 |
| Li et al [40]         | Quantitative MRI radiomics in the prediction of molecular classifications of breast cancer subtypes in the TCGA/TCIA data set | NPJ Breast Cancer | 2016 | 91 |
| Li et al [41]         | MR Imaging Radiomics Signatures for Predicting the Risk of                                                                    | Radiology         | 2016 | 84 |

|                                               |                                                                                                                                                                                                                                                    |                                           |      |     |
|-----------------------------------------------|----------------------------------------------------------------------------------------------------------------------------------------------------------------------------------------------------------------------------------------------------|-------------------------------------------|------|-----|
| Wu et al [45]                                 | Breast Cancer Recurrence as Given by Research Versions of MammaPrint, Oncotype DX, and PAM50 Gene Assays<br>Unsupervised clustering of quantitative image phenotypes reveals breast cancer subtypes with distinct prognoses and molecular pathways | Clinical Cancer Research                  | 2018 | 96  |
| Kim et al [46]                                | Associations between gene expression profiles of invasive breast cancer and breast imaging reporting and data system MRI lexicon                                                                                                                   | Annals of Surgical Treatment and Research | 2017 | 70  |
| Wu et al [49]                                 | Heterogeneous Enhancement Patterns of Tumor-adjacent Parenchyma at MR Imaging Are Associated with Dysregulated Signaling Pathways and Poor Survival in Breast Cancer                                                                               | Radiology                                 | 2017 | 126 |
| Wu et al [39]                                 | Identifying relations between imaging phenotypes and molecular subtypes of breast cancer: model discovery and external validation                                                                                                                  | Journal Of Magnetic Resonance Imaging     | 2017 | 84  |
| Fan et al [48]                                | Tumour heterogeneity revealed by unsupervised decomposition of dynamic contrast-enhanced magnetic resonance imaging is associated with underlying gene expression patterns and poor survival in breast cancer patients.                            | Breast Cancer Res                         | 2019 | 87  |
| <b>Clear Cell Renal Cell Carcinoma (KIRC)</b> |                                                                                                                                                                                                                                                    |                                           |      |     |
| Shinagare et al [53]                          | Radiogenomics of clear cell renal cell carcinoma: preliminary findings of The Cancer Genome Atlas-Renal Cell Carcinoma (TCGA-RCC) Imaging Research Group.                                                                                          | Journal of Medical Imaging                | 2015 | 103 |
| Bowen et al [56]                              | Radiogenomics of Clear Cell Renal Cell Carcinoma: Associations Between mRNA-Based Subtyping and CT Imaging Features                                                                                                                                | Academic Radiology                        | 2018 | 177 |
| <b>Other Tumours</b>                          |                                                                                                                                                                                                                                                    |                                           |      |     |
| Vargas et al [58]                             | Radiogenomics of High-Grade Serous Ovarian Cancer: Multireader Multi-Institutional Study from the Cancer Genome Atlas Ovarian Cancer Imaging Research Group                                                                                        | Radiology                                 | 2017 | 92  |
| Lai et al [60]                                | Acute Tumor Transition Angle on Computed Tomography Predicts Chromosomal Instability Status of Primary Gastric Cancer: Radiogenomics Analysis from TCGA and Independent Validation                                                                 | Cancers                                   | 2019 | 40  |
